# Supplementary material for: Ferrocene-Based Terpolyamides and Their PDMS-Containing Block Copolymers: Synthesis and Physical Properties
Source: MDPI journal article supplement (doi:10.3390/polym14235087), 2022-11-23
Supplement: s1 [file s1]

## **Supplementary information**

### **Ferrocene-Based Terpolyamides and their PDMS Containing Block Copolymers: Synthesis and Physical Properties**

**Irrum Mushtaq,<sup>1,3\*</sup> Erum Jabeen,<sup>2</sup> Zareen Akhter,<sup>3\*</sup> Fatima Javed,<sup>4</sup> Azfar Hassan,<sup>5</sup>  
Muhammad Saif Ullah Khan,<sup>3</sup> Faheem Ullah,<sup>1,6</sup> Faiz Ullah Shah<sup>7\*</sup>**

<sup>1</sup>Department of Biological Sciences, National University of Medical Sciences, The Mall road,  
Rawalpindi, 46000, Pakistan

<sup>2</sup>Department of Chemistry, Faculty of Science, Allama Iqbal Open University, Islamabad, 44310,  
Pakistan

<sup>3</sup>Department of Chemistry, Quaid-i-Azam University, Islamabad, 45320, Pakistan

<sup>4</sup>Department of Chemistry, Shaheed Benazir Bhutto Women University, Peshawar, 25000,  
Pakistan

<sup>5</sup>Department of Chemical and Petroleum Engineering, University of Calgary, Calgary, AB, T2N  
1N4 Canada

<sup>6</sup>School of Materials and Mineral Resources Engineering, Engineering Campus, University Sains  
Malaysia Nibong Tebal, 14300, Palau Penang, Malaysia

<sup>7</sup>Chemistry of Interfaces, Luleå University of Technology, SE-971 87 Luleå, Sweden

#### **Corresponding authors:**

Irrum Mushtaq  
Irrum.mushtaq@numspak.edu.pk

Zareen Akhter  
Zareen\_a@qau.edu.pk

Faiz Ullah Shah  
faiz.ullah@ltu.se

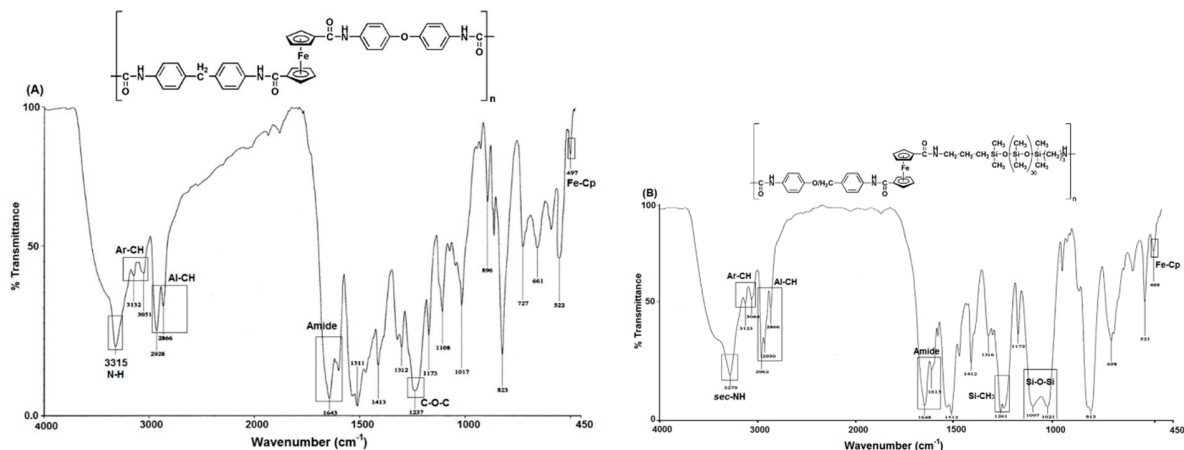

**Figure S1.** Representative FTIR spectra. (A) Terpolyamide (F2), and (B) block copolymer (PF2).

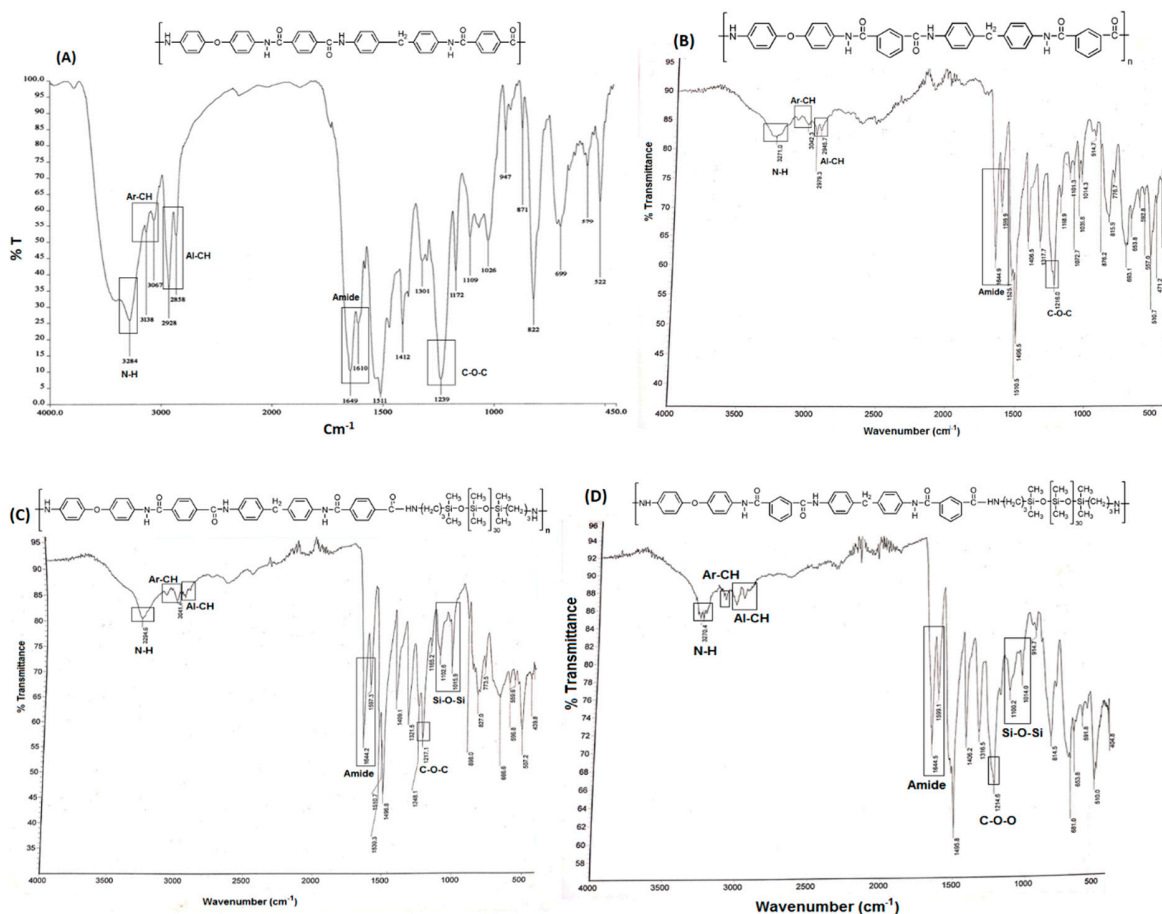

**Figure S2.** FTIR spectra of representative terpolymers (A) T2, and (B) I2 and their PDMS containing block copolymers (C) PT2, and (D) PI2.

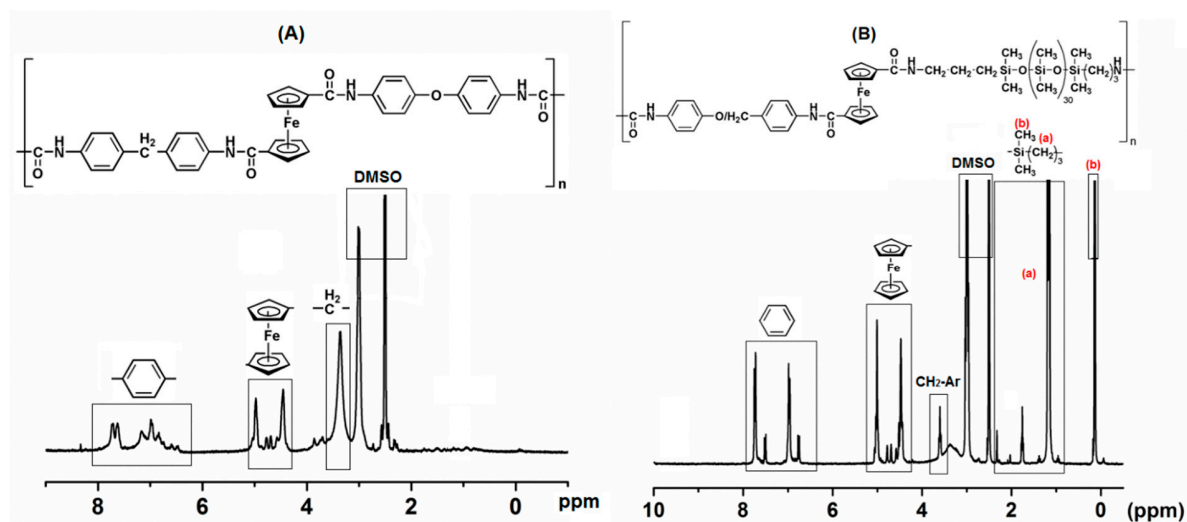

**Figure S3.**  $^1\text{H}$  NMR spectra. (A) Ferrocene-based terpolyamide (F2), (B) Ferrocene-based PDMS containing block copolymer.

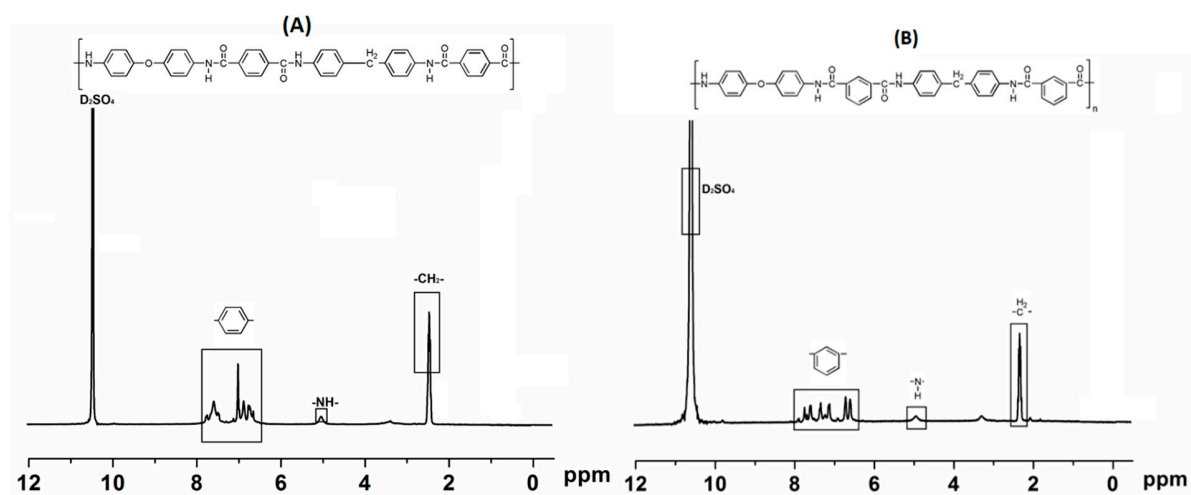

**Figure S4.**  $^1\text{H}$  NMR spectra of the representative organic analogues (A) T2 and (B) I2.

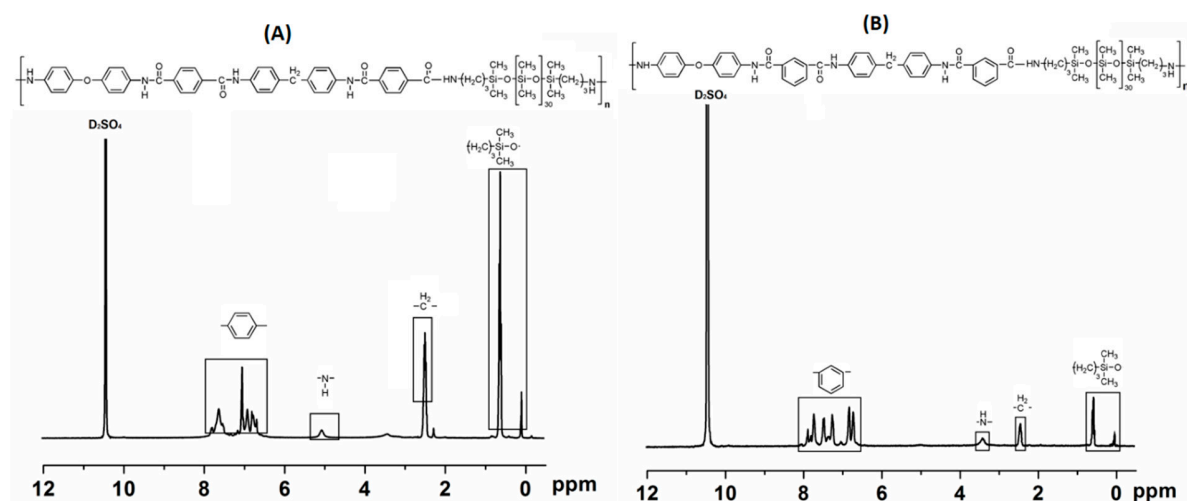

**Figure S5.**  $^1\text{H}$  NMR spectra of the representative organic analogues of PDMS containing block copolymers (A) PT2 and (B) PI2.

**Table S1.** Computed HOMO and LUMO spread of small monomeric units computed at DFT/B3LYP/6-311G\*\*(d, p) basis set.

| Codes | Structures                                                                          | HOMO                                                                                 | LUMO                                                                                  |
|-------|-------------------------------------------------------------------------------------|--------------------------------------------------------------------------------------|---------------------------------------------------------------------------------------|
| M1    | 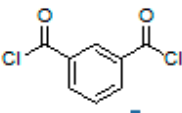 |  |  |
| M1'   |  |  |  |

|    |                                                                                     |                                                                                      |                                                                                       |
|----|-------------------------------------------------------------------------------------|--------------------------------------------------------------------------------------|---------------------------------------------------------------------------------------|
| M2 |    |    |    |
| M3 |    |    |    |
| M4 |    |    |    |
| M5 |    |   |   |
| M6 |  |  |  |
